# Supplementary material for: Specific IgE and Basophil Activation Test by Microarray: A Promising Tool for Diagnosis of Platinum Compound Hypersensitivity Reactions
Source: Preprints.org preprint supplement (doi:10.20944/preprints202403.1630.v1), 2024-03-26
Supplement: Supplementary file 1 [file supplementary]

Supplementary Figures


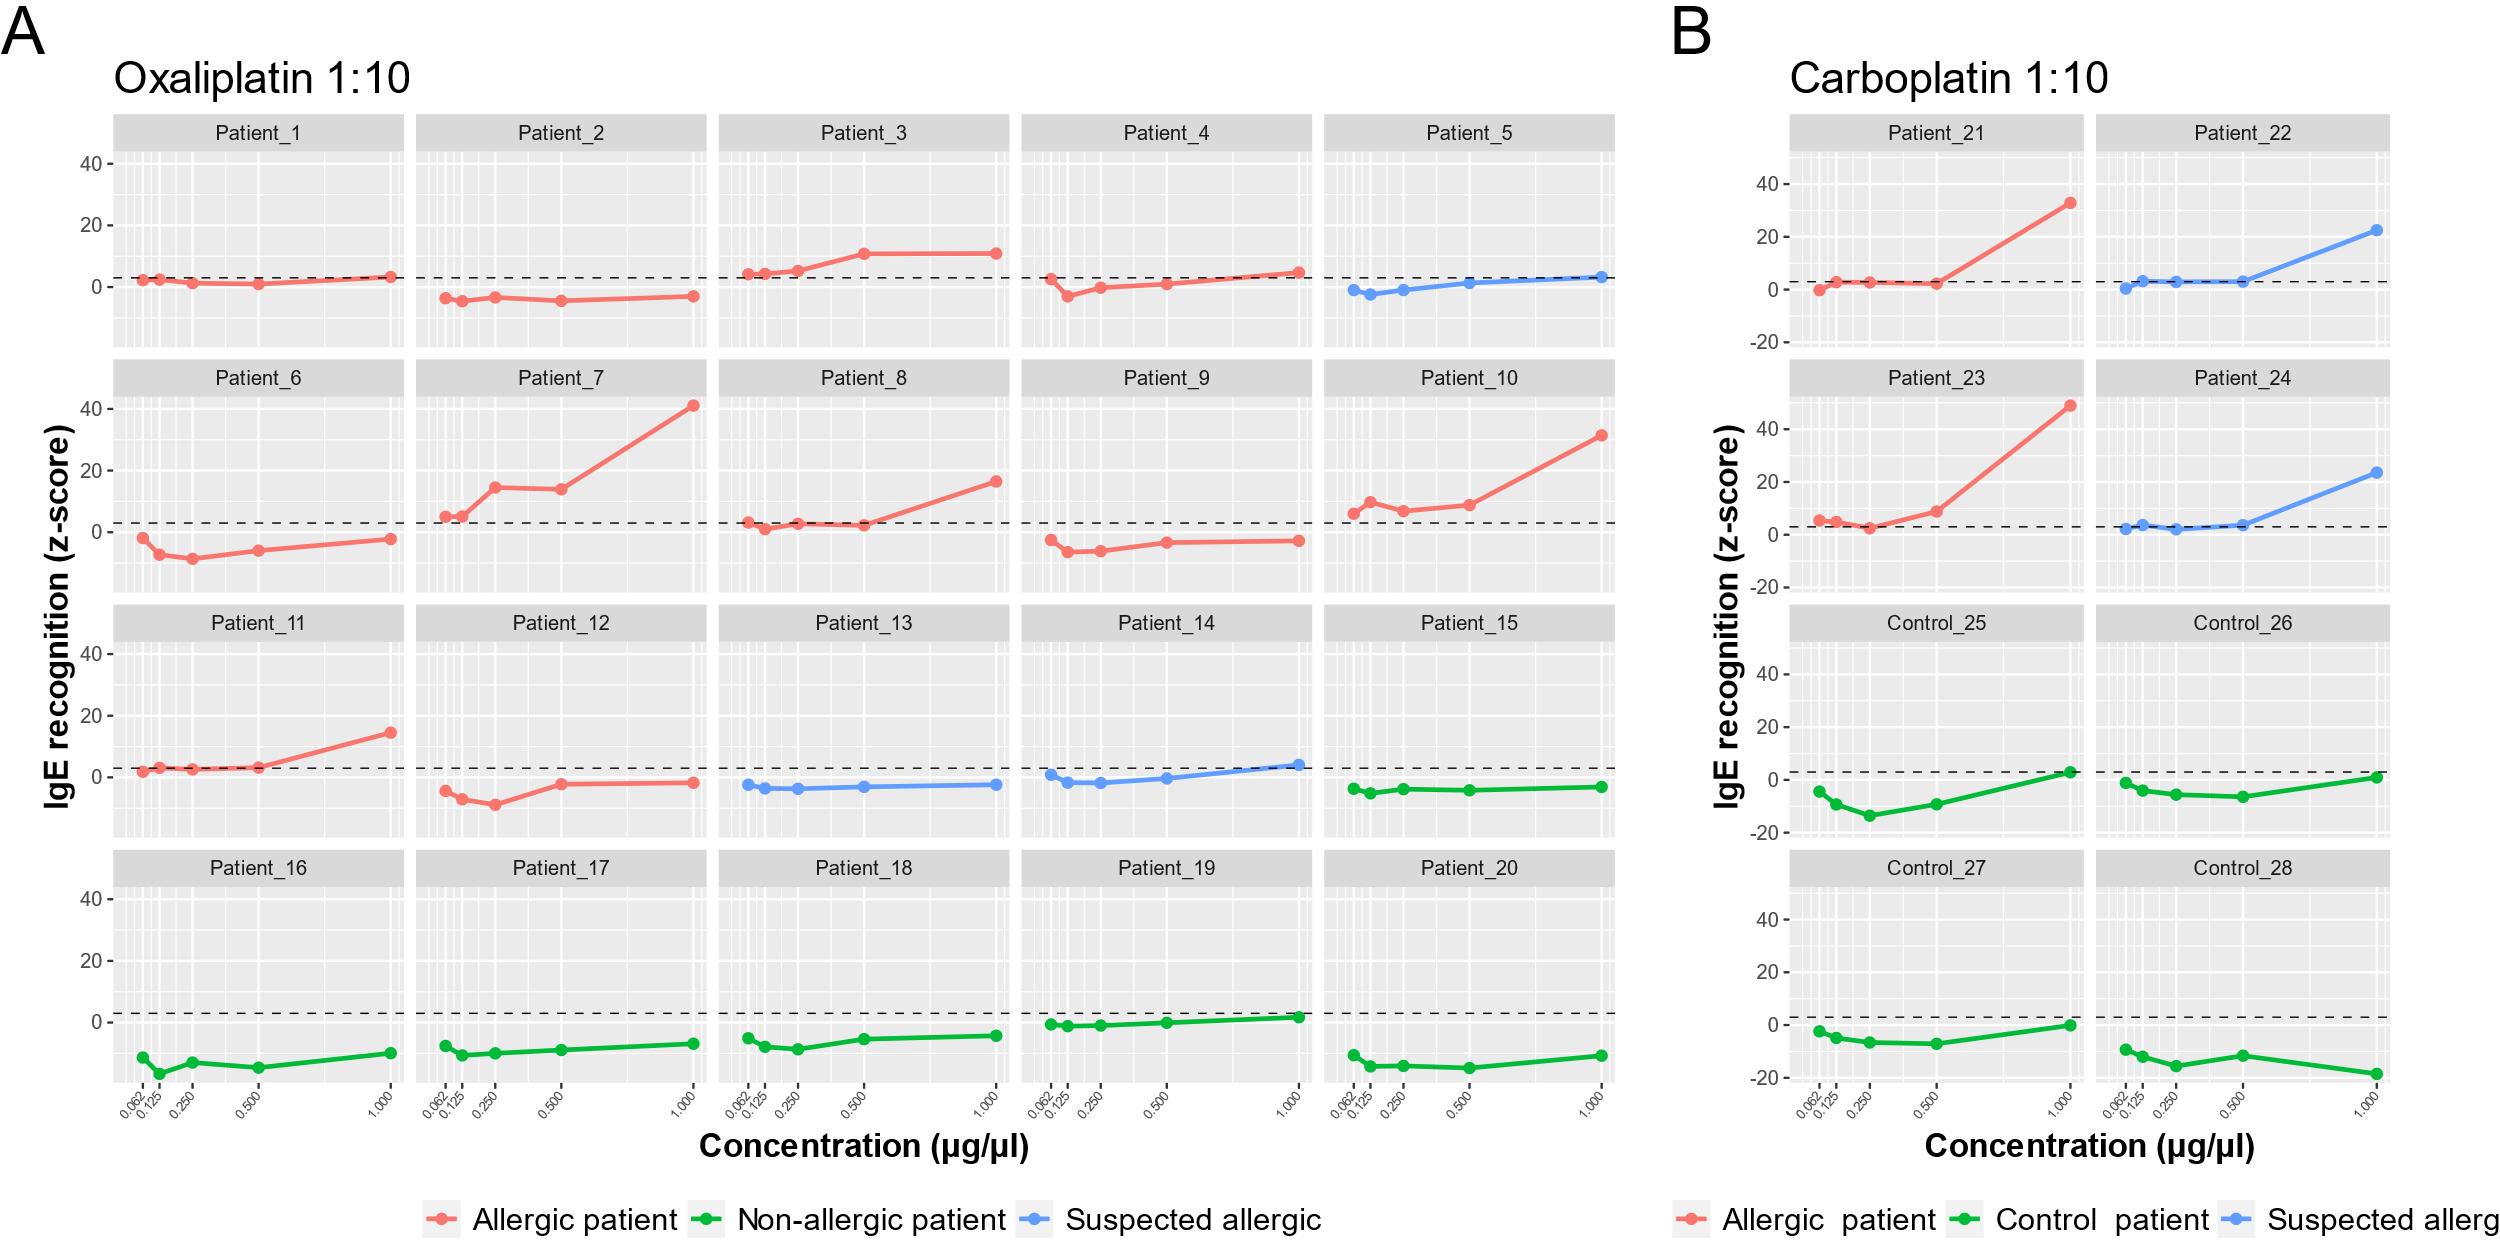


SUPPLEMENTARY FIGURE 1 sIgE microarrays immunoassay. The y-axis shows the average IgE binding represented as average Z-scores. The x-axis shows the drug concentration: oxaliplatin (A) and carboplatin (B) 1:10 molar ratio. The standardized fluorescence intensity represented as the average Z-score was considered positive if it exceeded 3 (dotted line).


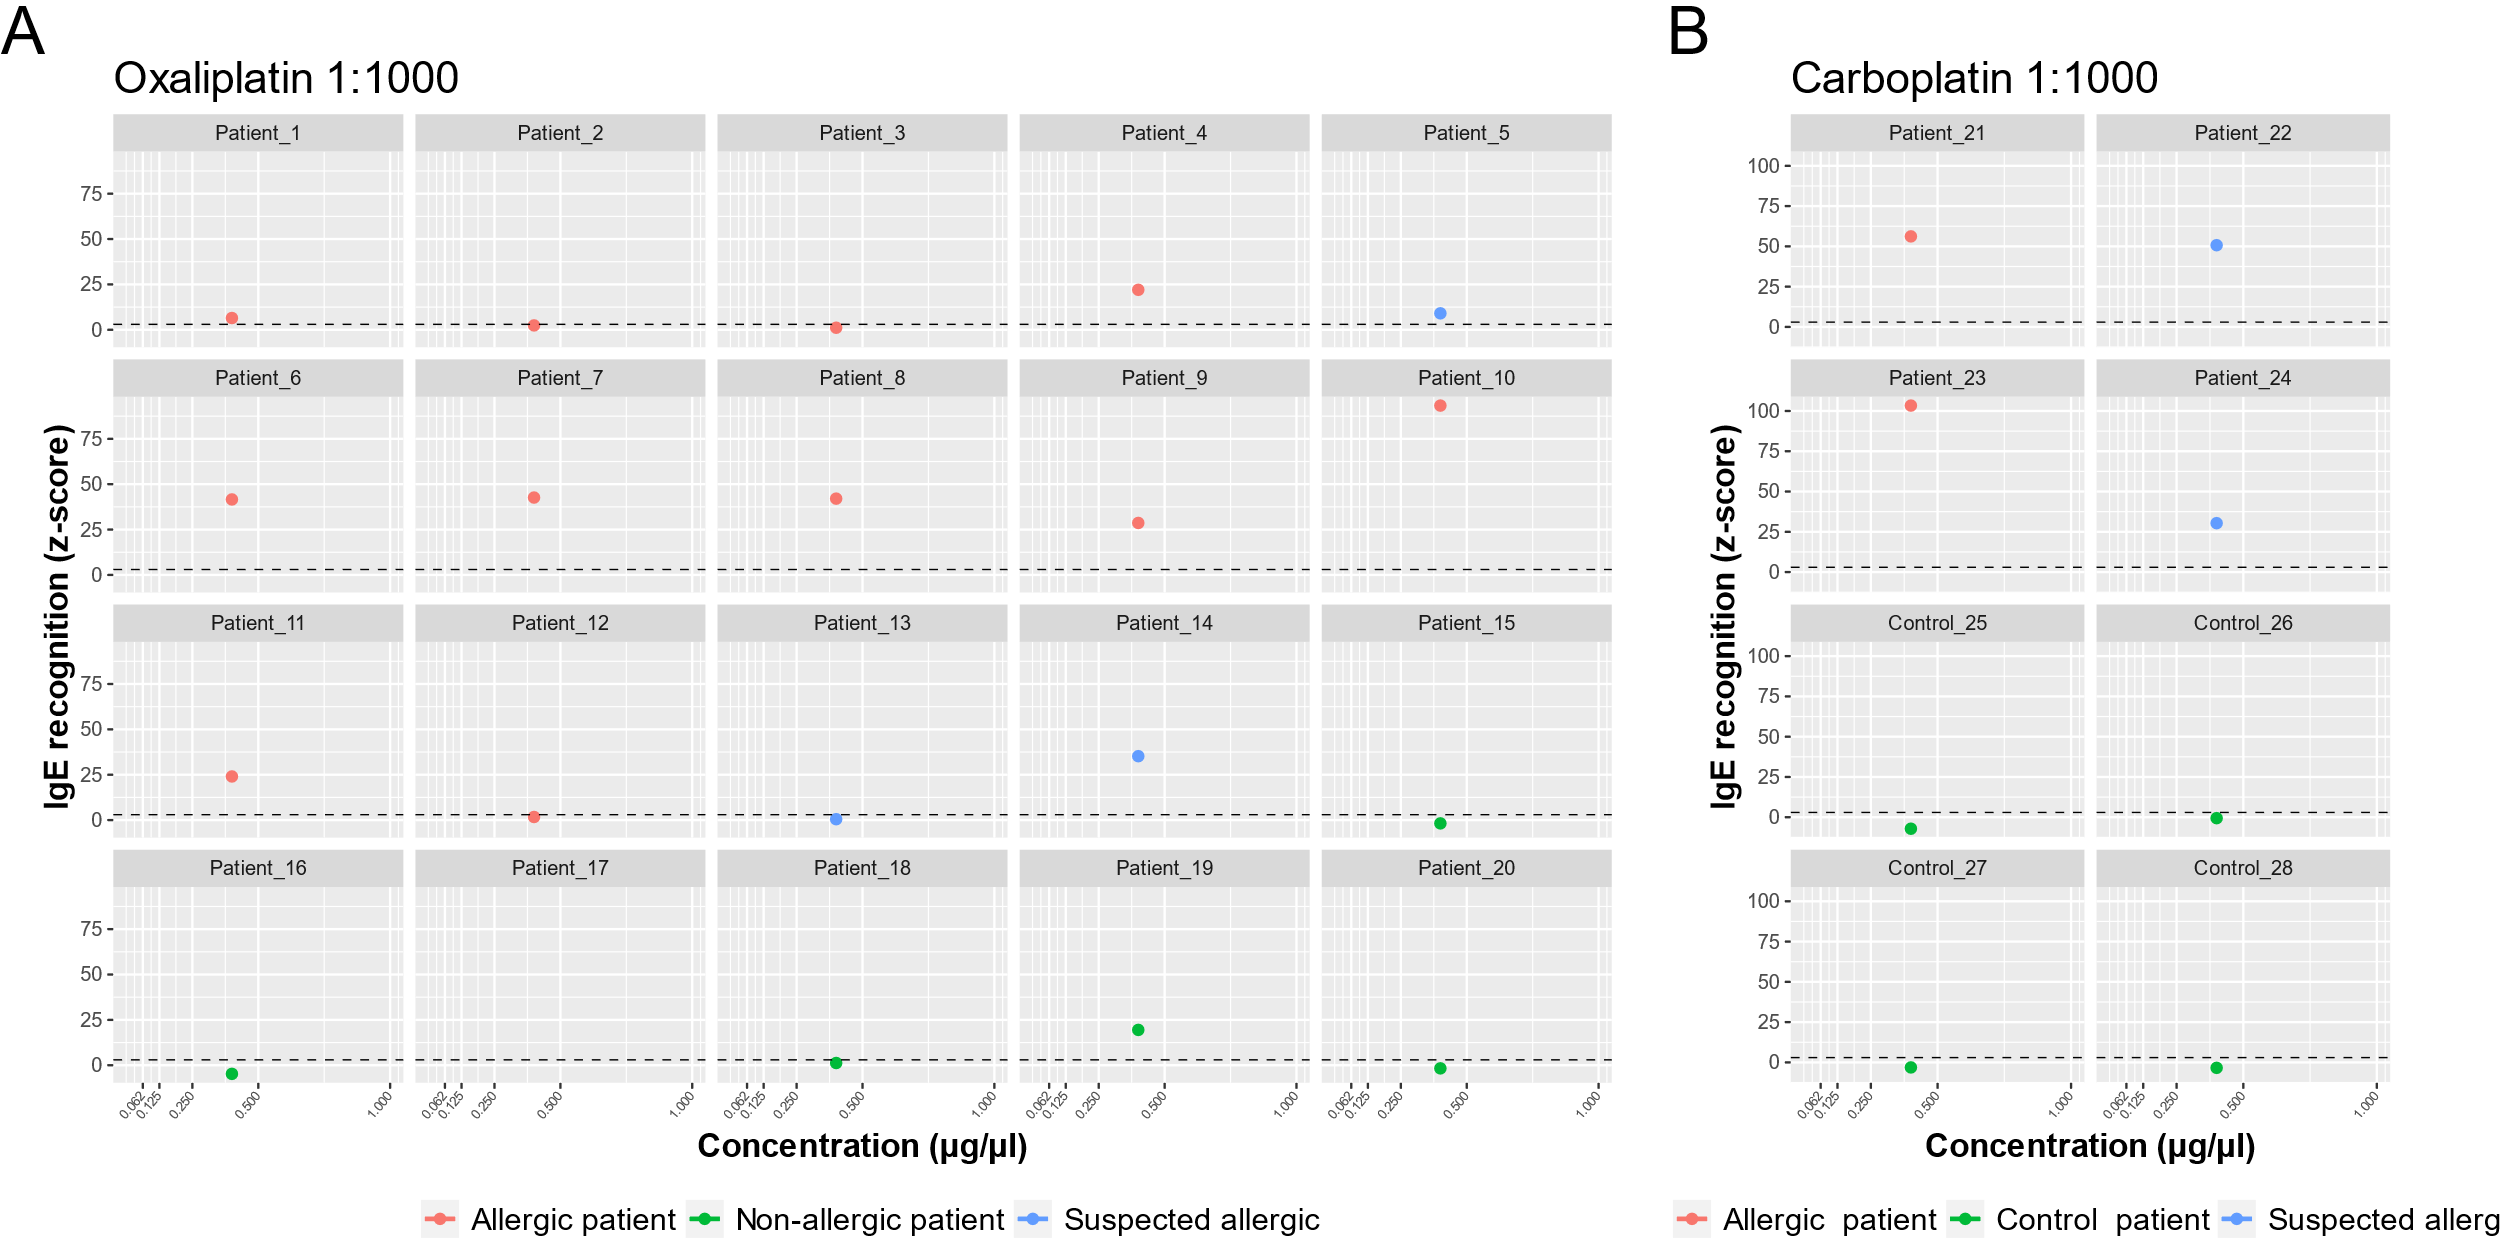


SUPPLEMENTARY FIGURE 2 sIgE microarrays immunoassay. The y-axis shows the average IgE binding represented as average Z-scores. The x-axis shows the drug concentration: oxaliplatin (A) and carboplatin (B) 1:1000 molar ratio. The standardized fluorescence intensity represented as the average Z-score was considered positive if it exceeded 3 (dotted line).


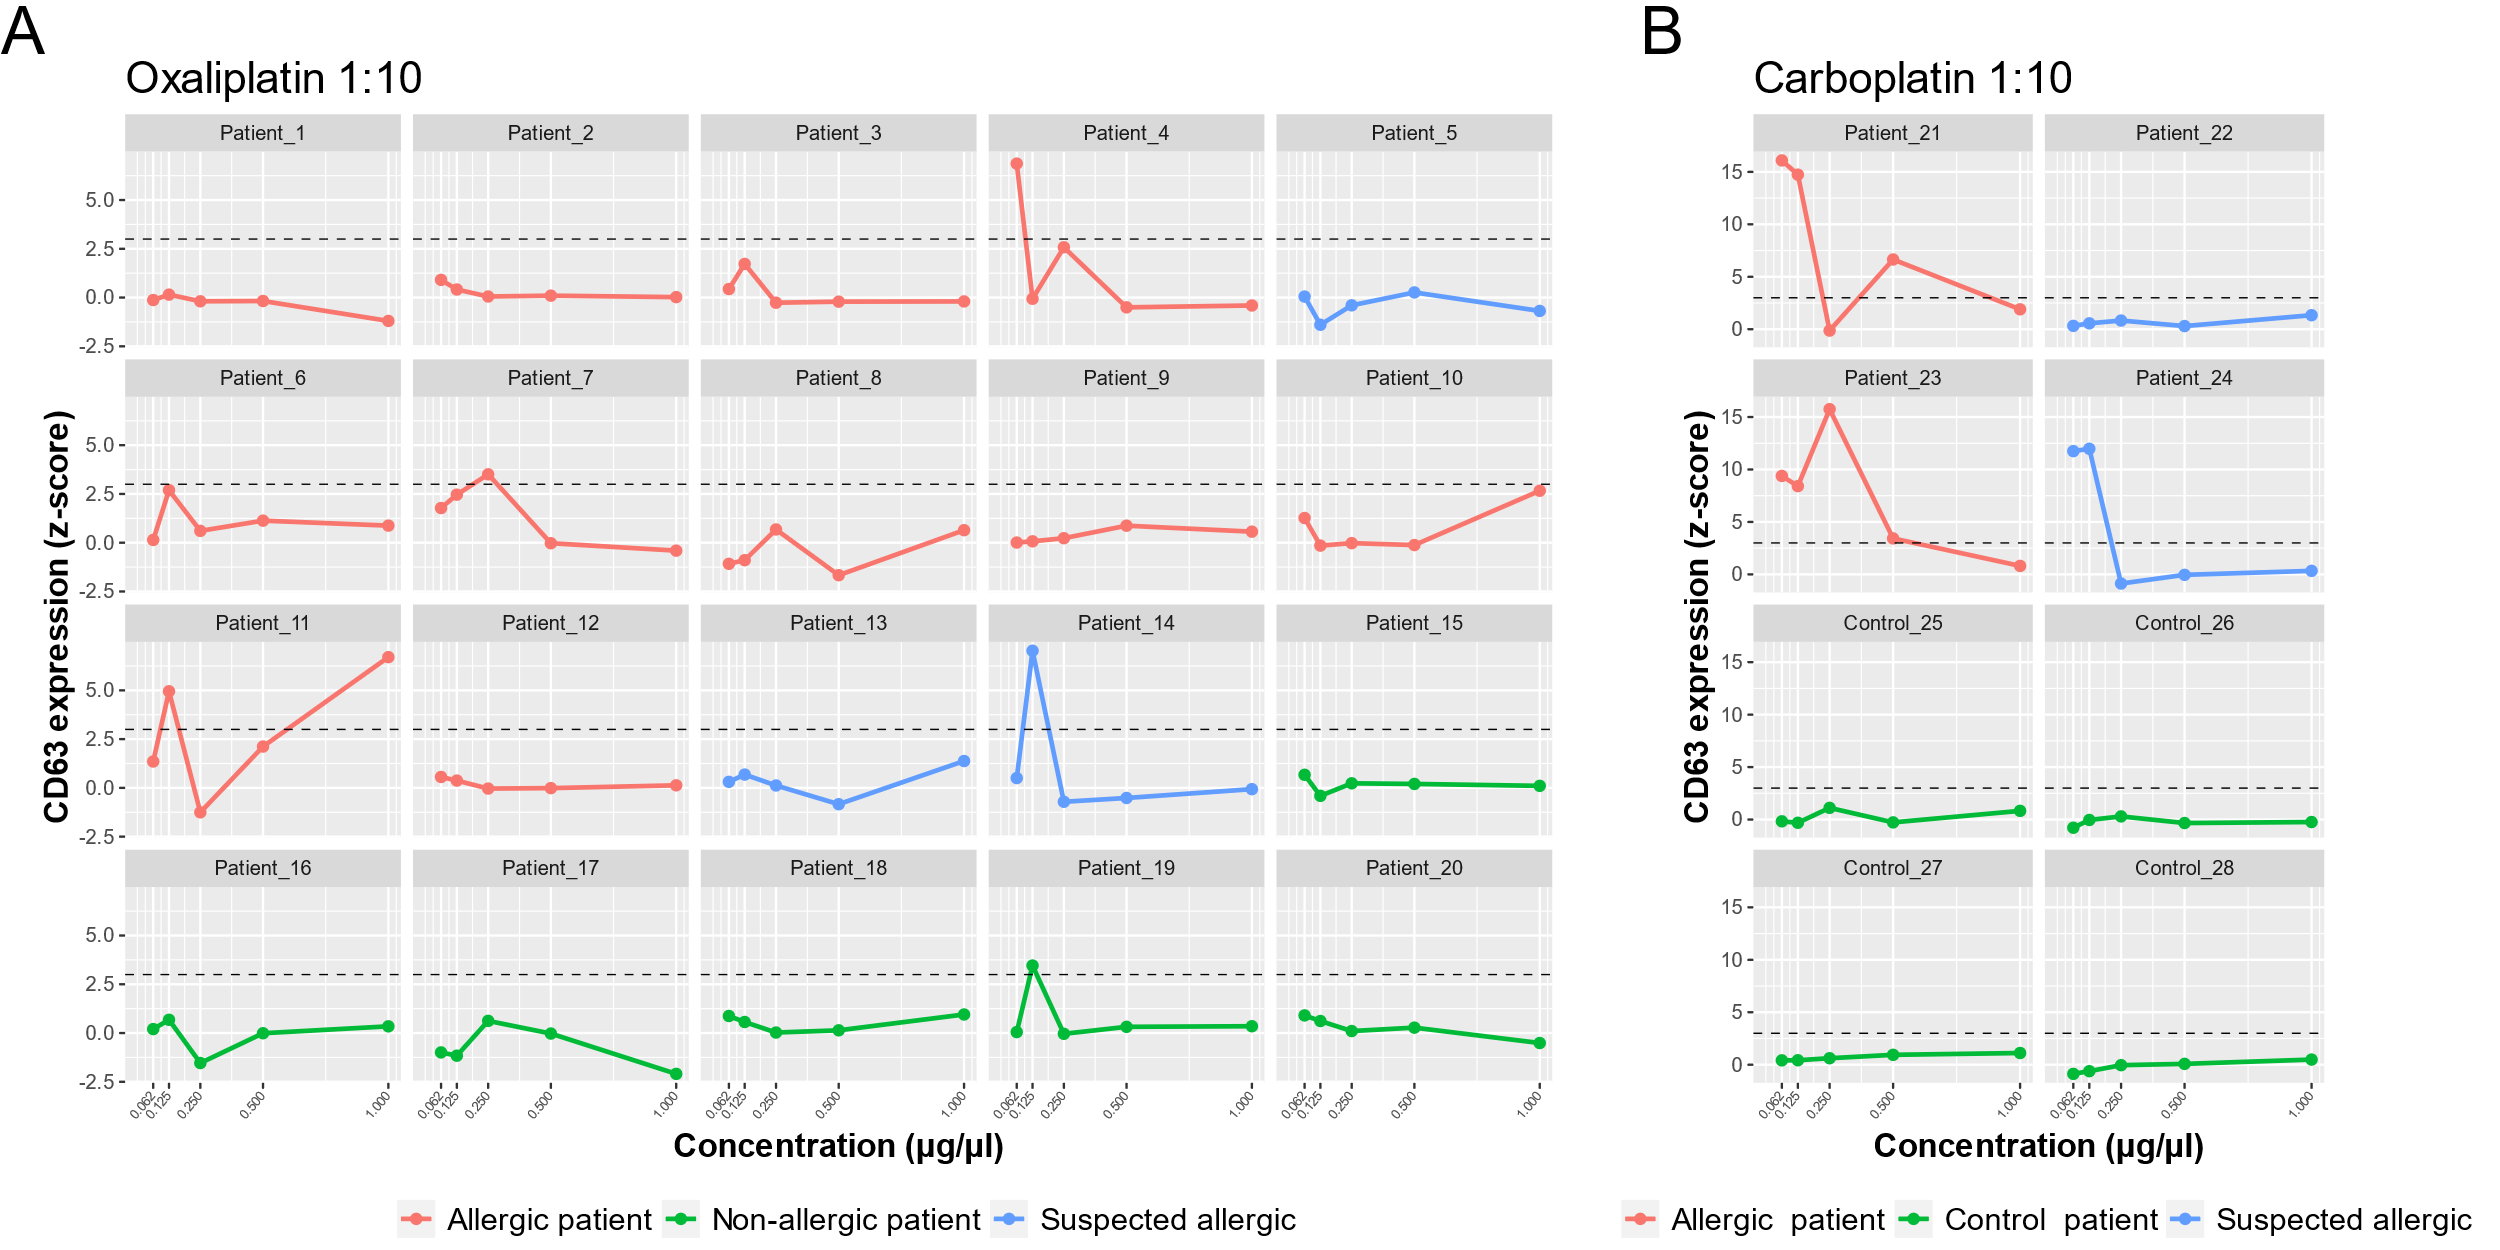


SUPPLEMENTARY FIGURE 3 BAT-microarray immunoassay.The y-axis shows the average CD63 expression represented as average Z-scores. The x-axis shows the drug concentration: oxaliplatin (A) and carboplatin (B) 1:10 molar ratio. The standardized fluorescence intensity represented as the average Z-score was considered positive if it exceeded 3 (dotted line).


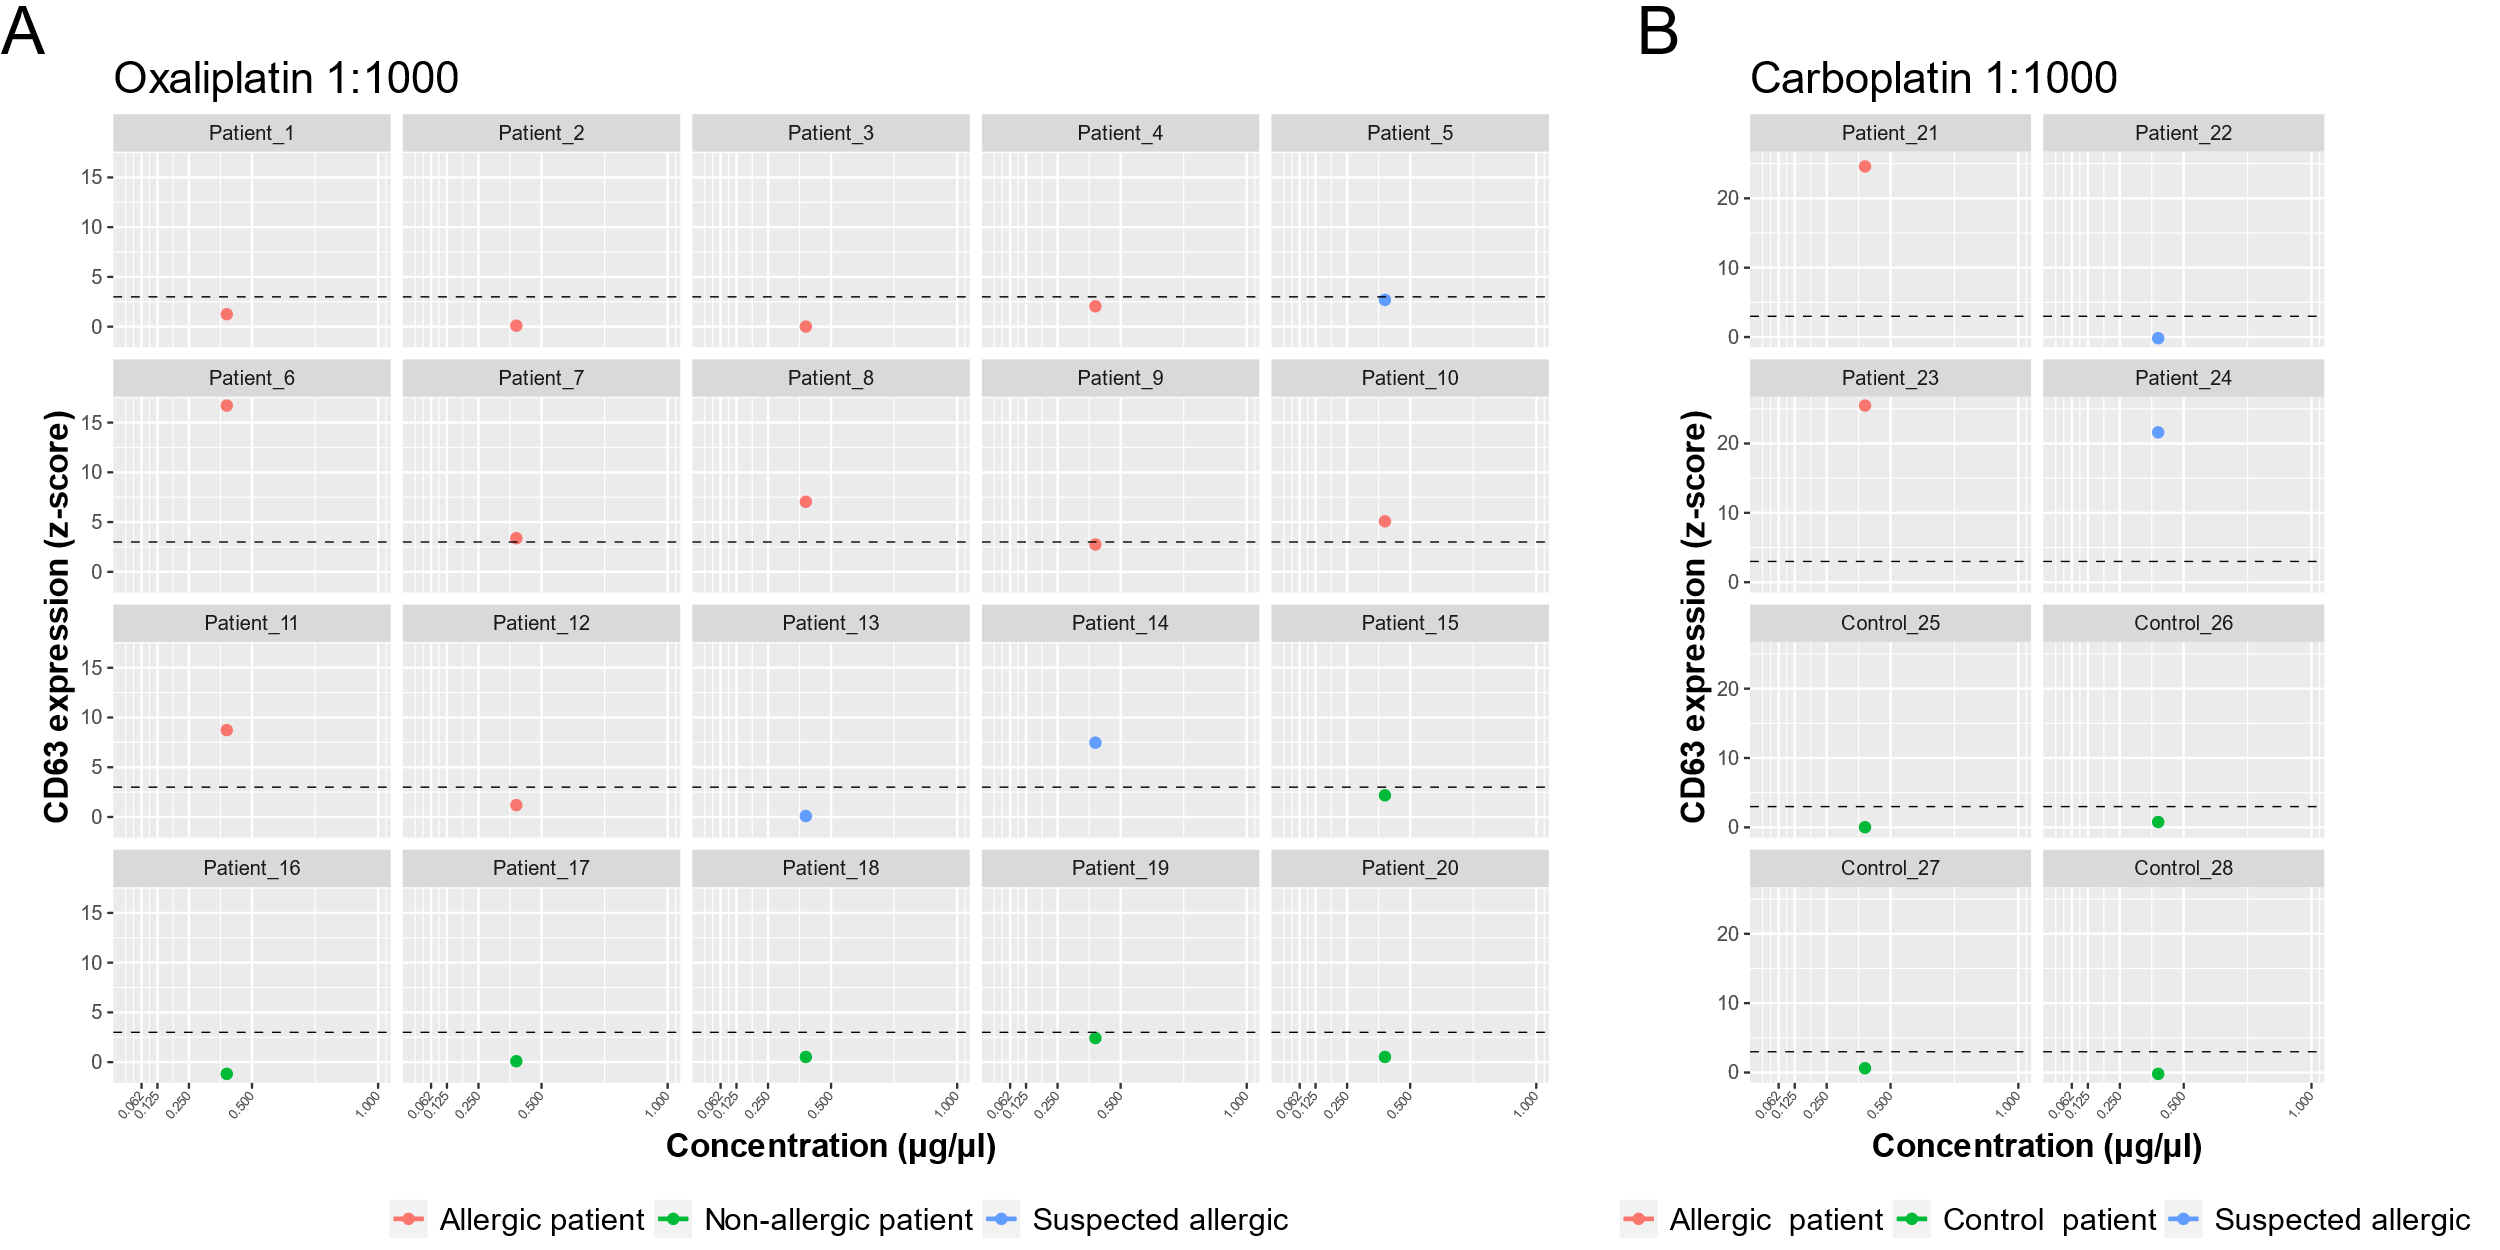


SUPPLEMENTARY FIGURE 4 BAT-microarray immunoassay.The y-axis shows the average CD63 expression represented as average Z-scores. The x-axis shows the drug concentration: oxaliplatin (A) and carboplatin (B) 1:1000 molar ratio. The standardized fluorescence intensity represented as the average Z-score was considered positive if it exceeded 3 (dotted line).
